# Supplementary material
Source: publisher figshare collection journal article supplement (https://springernature.figshare.com/ndownloader/files/22044651)
Supplement: Supplementary file [file 22044651]

(A)

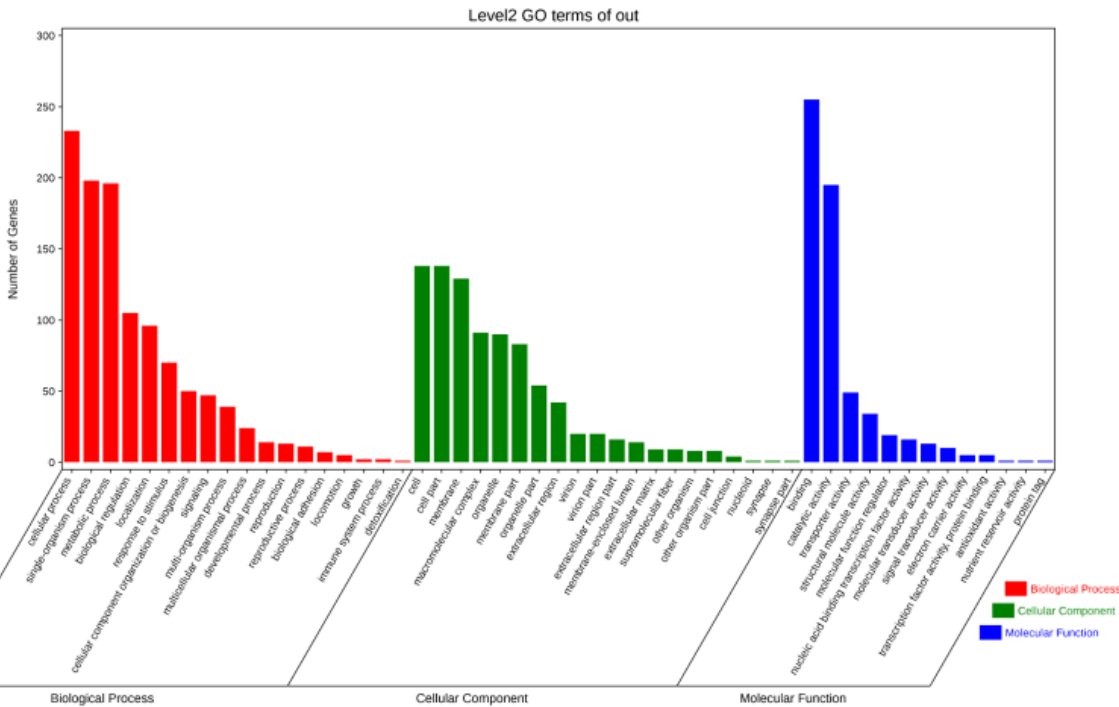

(B)

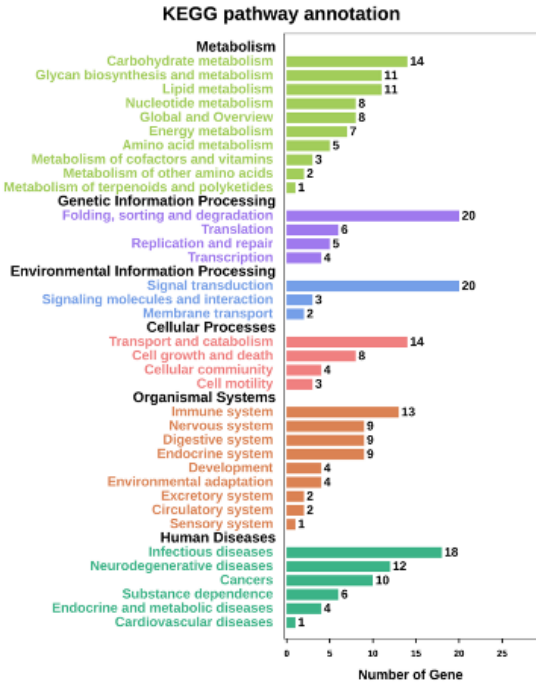

**Additional file 8: Figure S2.** GO (a) and KEGG (b) distribution of the highly expressed genes in *Glyptelasma gigas*
